# Supplementary material
Source: publisher figshare collection journal article supplement (https://karger.figshare.com/ndownloader/files/36564342)
Supplement: Supplementary file 1 [file 36564342]

**Supplementary Table 2**. Descriptive characteristics according to quartiles of the dietary sodium-to-potassium ratio

|  | Quartiles of the dietary sodium-to-potassium ratio | | | |
| --- | --- | --- | --- | --- |
| <1.21 | 1.21 to 1.49 | 1.50 to 1.83 | >1.83 |
| Participants, n | 1,568 | 1,569 | 1,568 | 1,569 |
| Dietary sodium-to-potassium ratio | 1.01 (0.86, 1.11) | 1.36 (1.29, 1.43) | 1.66 (1.58, 1.74) | 2.11 (1.96, 2.37) |
| Dietary sodium intake*, mg/day | 3496.5 (2826.9, 4174.3) | 4435.7 (3694.6, 5215.7) | 5017.9 (4183.1, 6072.5) | 5736.1 (4634.2, 7013.5) |
| Dietary potassium intake*, mg/day | 3601.2 (3028.7, 4231.9) | 3262.3 (2729.2, 3813.8) | 3026.5 (2520.7, 3638.2) | 2631.0 (2078.9, 3240.4) |
| ACR, mg/g | 11 (6, 22.8) | 11 (6, 23) | 11 (6, 24) | 12 (6, 29) |
| Spot urinary sodium-to-potassium ratio | 2.35 (1.62, 3.35) | 2.54 (1.82, 3.62) | 2.79 (1.95, 3.97) | 3.09 (2.20, 4.32) |
| Spot urinary sodium, mmol/g Cr | 153.3 (100.0, 231.4) | 165.9 (110.9, 240.5) | 170.1 (108.3, 246.2) | 174.2 (110.8, 249.1) |
| Spot urinary potassium, mmol/g Cr | 64.5 (47.0, 84.7) | 63.2 (46.7, 85.1) | 58.7 (42.8, 79.8) | 53.7 (40.0, 72.3) |
| Male sex, n (%) | 589 (37.6) | 640 (40.8) | 813 (51.9) | 1,036 (66.0) |
| Age, years | 67.8 ± 9.4 | 68.3 ± 9.7 | 68.5 ± 10.0 | 68.8 ± 10.1 |
| Body mass index, kg/m2 | 22.5 ± 3.1 | 22.6 ± 3.1 | 22.7 ± 3.1 | 22.8 ± 3.1 |
| Systolic blood pressure, mmHg | 129.5 ± 18.0 | 129.7 ± 18.1 | 130.1 ± 17.9 | 130.4 ± 18.1 |
| Diastolic blood pressure, mmHg | 74.8 ± 10.9 | 74.7 ± 10.9 | 74.9 ± 10.6 | 75.8 ± 10.9 |
| eGFR, mL/min/1.73 m2 | 73.6 ± 15.4 | 74.4 ± 15.6 | 75.0 ± 15.5 | 75.8 ± 16.4 |
| Energy intake, kcal/day | 1837.5 (1419.0, 2371.8) | 1910.5 (1554.7, 2410.7) | 1961.1 (1575.8, 2489.9) | 1962.3 (1533.5, 2493.7) |
| Use of any antihypertensive medication, n (%) | 509 (32.5) | 529 (33.7) | 550 (35.1) | 581 (37.0) |
| Use of any antidiabetic medication, n (%) | 96 (6.1) | 77 (4.9) | 108 (6.9) | 89 (5.7) |
| Diabetes, n (%) | 142 (9.1) | 131 (8.4) | 164 (10.5) | 171 (10.9) |
| Hypertension, n (%) | 771 (49.2) | 785 (50.0) | 821 (52.4) | 846 (53.9) |
| History of stroke, n (%) | 63 (4.0) | 67 (4.3) | 65 (4.2) | 71 (4.5) |
| History of heart diseases, n (%) | 86 (5.5) | 85 (5.4) | 69 (4.4) | 81 (5.2) |
| Current smoking, n (%) | 201 (12.8) | 170 (10.8) | 208 (13.3) | 315 (20.1) |
| Drink alcohol everyday, n (%) | 352 (22.5) | 447 (28.5) | 518 (33.0) | 708 (45.1) |
| Spot urine collection in the morning, n (%) | 1,109 (70.7) | 1,132 (72.2) | 1,157 (73.8) | 1,133 (72.2) |

Values are presented as the mean ± standard deviation, median (interquartile interval), or numbers (percentage). *Dietary sodium and potassium intakes were adjusted by energy intake using the residual method. ACR Urinary albumin-to-creatinine ratio, eGFR Estimated glomerular filtration rate.
